# Supplementary material for: Modelling the Noise-Robustness of Infants’ Word Representations: The Impact of Previous Experience
Source: PLOS journal article supplement (doi:10.1371/journal.pone.0132245), 2015-07-28
Supplement: S1 (10.1371/journal.pone.0132245.s001) [file journal.pone.0132245.s001]

## S1 File

Table A

Table 1. Supporting Table A: Results of a linear model based on matching when the speaker is known.

| <b>Residuals:</b>                  |          |           |         |        |     |
|------------------------------------|----------|-----------|---------|--------|-----|
| Min                                | 1Q       | Median    | 3Q      | Max    |     |
| -1.19                              | -0.21    | -0.02     | 0.20    | 1.48   |     |
| <b>Coefficients:</b>               |          |           |         |        |     |
|                                    | Estimate | Std.Error | t value | Pr(>t) |     |
| (Intercept)                        | 0.62     | 0.08      | 7.16    | <.001  | *** |
| Experiment: Increased Frequency    | 1.30     | 0.09      | 13.47   | <.001  | *** |
| Experiment: Multiple Voices        | -0.26    | 0.09      | -2.69   | .007   | **  |
| Noise Level: 5 dB SNR noise        | -0.23    | 0.09      | -2.44   | .015   | *   |
| Noise Level: noise-free            | 2.08     | 0.09      | 21.53   | <.001  | *** |
| Cat                                | -0.70    | 0.05      | -12.54  | <.001  | *** |
| Mummy                              | -0.49    | 0.05      | -8.90   | <.001  | *** |
| Sample point                       | 0.01     | 0.007     | 1.77    | .07    |     |
| Increased Frequency:5 dB SNR noise | -0.23    | 0.13      | -1.68   | .09    |     |
| Multiple Voices:5 dB SNR noise     | 0.41     | 0.13      | 3.05    | .002   | **  |
| Increased Frequency:noise-free     | 1.41     | 0.13      | 10.30   | <.001  | *** |
| Multiple Voices:noise-free         | -0.91    | 0.13      | -6.64   | <.001  | *** |

Results for the linear model based on *matching* when the speaker is known. Significance indicators (uncorrected): \*  $p < .05$ , \*\*  $p < .01$ , \*\*\*  $p < .001$

Table B

**Table 2. Supporting Table B: Results of a linear model based on recognition when the speaker is known.**

| <b>Residuals:</b>                  |          |           |         |        |     |
|------------------------------------|----------|-----------|---------|--------|-----|
| Min                                | 1Q       | Median    | 3Q      | Max    |     |
| -1.65                              | -0.39    | 0.01      | 0.33    | 2.15   |     |
| <b>Coefficients:</b>               |          |           |         |        |     |
|                                    | Estimate | Std.Error | t value | Pr(>t) |     |
| (Intercept)                        | 2.21     | 0.13      | 16.44   | <.001  | *** |
| Experiment: Increased Frequency    | .00      | 0.14      | 6.73    | <.001  | *** |
| Experiment: Multiple Voices        | -2.36    | 0.14      | -15.89  | <.001  | *** |
| Noise Level: 5 dB SNR noise        | -0.84    | 0.14      | -5.64   | <.001  | *** |
| Noise Level: noise-free            | 3.00     | 0.14      | 20.18   | <.001  | *** |
| Cat                                | 0.01     | 0.08      | 0.19    | .84    |     |
| Mummy                              | -0.58    | 0.08      | -6.80   | <.001  | *** |
| Sample point                       | 0.03     | 0.01      | 2.87    | .004   | **  |
| Increased Frequency:5 dB SNR noise | -0.19    | 0.21      | -0.93   | .34    |     |
| Multiple Voices:5 dB SNR noise     | 1.32     | 0.21      | 6.30    | <.001  | *** |
| Increased Frequency:noise-free     | 1.52     | 0.21      | 7.23    | <.001  | *** |
| Multiple Voices:noise-free         | -1.76    | 0.21      | -8.36   | <.001  | *** |

Results for the linear model based on *recognition* when the speaker is known. Significance indicators (uncorrected): \*  $p < .05$ , \*\*  $p < .01$ , \*\*\*  $p < .001$

Table C

**Table 3. Supporting Table C: Results of a linear model based on matching when the speaker is unknown.**

| <b>Residuals:</b>                  |          |           |         |        |     |
|------------------------------------|----------|-----------|---------|--------|-----|
| Min                                | 1Q       | Median    | 3Q      | Max    |     |
| -1.15                              | -0.25    | -0.007    | 0.21    | 1.22   |     |
| <b>Coefficients:</b>               |          |           |         |        |     |
|                                    | Estimate | Std.Error | t value | Pr(>t) |     |
| (Intercept)                        | 0.74     | 0.08      | 8.45    | <.001  | *** |
| Experiment: Increased Frequency    | 0.84     | 0.09      | 8.70    | <.001  | *** |
| Experiment: Multiple Voices        | 0.68     | 0.09      | 7.07    | <.001  | *** |
| Noise Level: 5 dB SNR noise        | -0.28    | 0.09      | -2.90   | .004   | **  |
| Noise Level: noise-free            | -0.02    | 0.09      | -0.28   | .77    |     |
| Cat                                | -1.30    | 0.05      | -23.24  | <.001  | *** |
| Mummy                              | -0.72    | 0.05      | -12.85  | <.001  | *** |
| Sample point                       | 0.006    | 0.007     | 0.82    | .40    |     |
| Increased Frequency:5 dB SNR noise | -0.08    | 0.13      | -0.61   | .53    |     |
| Multiple Voices:5 dB SNR noise     | -0.11    | 0.13      | -0.85   | .39    |     |
| Increased Frequency:noise-free     | 1.10     | 0.13      | 8.04    | <.001  | *** |
| Multiple Voices:noise-free         | 1.09     | 0.13      | 7.92    | <.001  | *** |

Results for the linear model based on *matching* when the speaker is unknown. Significance indicators (uncorrected): \*  $p < .05$ , \*\*  $p < .01$ , \*\*\*  $p < .001$

Table D

Table 4. Supporting Table D: Results of a linear model based on recognition when the speaker is unknown.

| <b>Residuals:</b>                  |          |           |         |        |     |
|------------------------------------|----------|-----------|---------|--------|-----|
| Min                                | 1Q       | Median    | 3Q      | Max    |     |
| -1.09                              | -0.19    | 0.01      | 0.22    | 1.19   |     |
| <b>Coefficients:</b>               |          |           |         |        |     |
|                                    | Estimate | Std.Error | t value | Pr(>t) |     |
| (Intercept)                        | 1.90     | 0.09      | 20.81   | <.001  | *** |
| Experiment: Increased Frequency    | 0.51     | 0.10      | 5.11    | <.001  | *** |
| Experiment: Multiple Voices        | -0.25    | 0.10      | -2.53   | .011   | *   |
| Noise Level: 5 dB SNR noise        | -0.37    | 0.10      | -3.65   | <.001  | *** |
| Noise Level: noise-free            | 0.58     | 0.10      | 5.80    | <.001  | *** |
| Cat                                | -1.30    | 0.05      | -22.35  | <.001  | *** |
| Mummy                              | -1.22    | 0.05      | -20.95  | <.001  | *** |
| Sample point                       | 0.004    | 0.008     | 0.59    | .55    |     |
| Increased Frequency:5 dB SNR noise | -0.12    | 0.14      | -0.85   | .39    |     |
| Multiple Voices:5 dB SNR noise     | -0.06    | 0.14      | -0.46   | .64    |     |
| Increased Frequency:noise-free     | 0.89     | 0.14      | 6.22    | <.001  | *** |
| Multiple Voices:noise-free         | 0.81     | 0.14      | 5.70    | <.001  | *** |

Results for the linear model based on *recognition* when the speaker is unknown. Significance indicators (uncorrected): \*  $p < .05$ , \*\*  $p < .01$ , \*\*\*  $p < .001$

Table E

Table 5. Supporting Table E: Simulated listening preferences based on matching.

| Experiment                            | Word   | SNR          |       |              |     |              |     |
|---------------------------------------|--------|--------------|-------|--------------|-----|--------------|-----|
|                                       |        | noise-free   | 10 dB | 5 dB         |     |              |     |
| <b>Known speaker during testing</b>   |        |              |       |              |     |              |     |
| 1. Baseline                           |        |              |       |              |     |              |     |
|                                       | cat    | 2.76 (0.53)  | ***   | -0.15 (0.32) |     | -0.38 (0.09) |     |
|                                       | mummy  | 2.14 (0.11)  | ***   | 0.34 (0.21)  | *** | 0.13 (0.22)  |     |
|                                       | banana | 2.28 (0.38)  | ***   | 0.72 (0.15)  | *** | 0.46 (0.11)  | *** |
| 2. Increased                          |        |              |       |              |     |              |     |
| Frequency                             | cat    | 5.07 (0.15)  | ***   | 1.10 (0.12)  | *** | 0.49 (0.14)  | *** |
|                                       | mummy  | 5.13 (0.19)  | ***   | 1.09 (0.25)  | *** | 0.91 (0.29)  | *** |
|                                       | banana | 5.35 (0.20)  | ***   | 2.40 (0.26)  | *** | 1.68 (0.35)  | *** |
| 3. Multiple                           |        |              |       |              |     |              |     |
| Voices                                | cat    | 0.91 (0.25)  | ***   | -0.24 (0.15) |     | -0.13 (0.09) |     |
|                                       | mummy  | 1.83 (0.21)  | ***   | -0.26 (0.25) |     | -0.07 (0.22) |     |
|                                       | banana | 1.15 (0.15)  | ***   | 0.60 (0.13)  | *** | 0.77 (0.15)  | *** |
| <b>Unknown speaker during testing</b> |        |              |       |              |     |              |     |
| 4. Baseline                           |        |              |       |              |     |              |     |
|                                       | cat    | -0.71 (0.13) |       | -0.29 (0.19) |     | -0.37 (0.10) |     |
|                                       | mummy  | 0.11 (0.16)  |       | 0.17 (0.15)  | **  | -0.38 (0.09) |     |
|                                       | banana | 0.82 (0.84)  | *     | 0.43 (0.14)  | *** | 0.21 (0.15)  | **  |
| 5. Increased                          |        |              |       |              |     |              |     |
| Frequency                             | cat    | 0.61 (0.52)  | **    | -0.02 (0.10) |     | -0.39 (0.08) |     |
|                                       | mummy  | 1.97 (0.37)  | ***   | 0.86 (0.15)  | *** | 0.43 (0.25)  | *** |
|                                       | banana | 2.80 (1.00)  | ***   | 1.67 (0.24)  | *** | 1.39 (0.29)  | *** |
| 6. Multiple                           |        |              |       |              |     |              |     |
| Voices                                | cat    | 1.41 (0.39)  | ***   | 0.29 (0.14)  | *** | -0.23 (0.10) |     |
|                                       | mummy  | 0.93 (0.61)  | **    | 0.78 (0.14)  | *** | 0.48 (0.15)  | *** |
|                                       | banana | 2.97 (0.85)  | ***   | 1.04 (0.15)  | *** | 0.68 (0.21)  | *** |

Simulated listening preferences based on *matching* (mean and standard deviation) for all conditions. Listening preferences that are significantly above 0 are indicated (based on an uncorrected one-sided *t*-Test): \*  $p < .05$ , \*\*  $p < .01$ , \*\*\*  $p < .001$

Table F

Table 6. Supporting Table F: Simulated listening preferences based on recognition.

| Experiment                            | Word   | SNR         |       |             |      |              |     |
|---------------------------------------|--------|-------------|-------|-------------|------|--------------|-----|
|                                       |        | noise-free  | 10 dB |             | 5 dB |              |     |
| <b>Known speaker during testing</b>   |        |             |       |             |      |              |     |
| 1. Baseline                           |        |             |       |             |      |              |     |
|                                       | cat    | 5.98 (0.66) | ***   | 2.16 (0.27) | ***  | 1.33 (0.21)  | *** |
|                                       | mummy  | 4.74 (0.17) | ***   | 2.31 (0.12) | ***  | 1.75 (0.12)  | *** |
|                                       | banana | 4.87 (0.47) | ***   | 1.82 (0.23) | ***  | 1.05 (0.17)  | *** |
| 2. Increased                          |        |             |       |             |      |              |     |
| Frequency                             | cat    | 7.90 (0.21) | ***   | 3.03 (0.17) | ***  | 1.83 (0.15)  | *** |
|                                       | mummy  | 7.29 (0.28) | ***   | 2.48 (0.23) | ***  | 1.95 (0.27)  | *** |
|                                       | banana | 7.62 (0.20) | ***   | 2.70 (0.29) | ***  | 2.70 (0.29)  | *** |
| 3. Multiple                           |        |             |       |             |      |              |     |
| Voices                                | cat    | 4.40 (0.53) | ***   | 1.51 (0.21) | ***  | 0.82 (0.17)  | *** |
|                                       | mummy  | 4.40 (0.28) | ***   | 1.65 (0.24) | ***  | 1.01 (0.23)  | *** |
|                                       | banana | 4.31 (0.22) | ***   | 1.81 (0.22) | ***  | 1.07 (0.27)  | *** |
| <b>Unknown speaker during testing</b> |        |             |       |             |      |              |     |
| 4. Baseline                           |        |             |       |             |      |              |     |
|                                       | cat    | 0.68 (0.10) | ***   | 0.62 (0.09) | ***  | 0.28 (0.05)  | *** |
|                                       | mummy  | 1.51 (0.27) | ***   | 0.90 (0.11) | ***  | 0.53 (0.08)  | *** |
|                                       | banana | 2.39 (0.44) | ***   | 1.19 (0.15) | ***  | 0.89 (0.13)  | *** |
| 5. Increased                          |        |             |       |             |      |              |     |
| Frequency                             | cat    | 0.76 (0.48) | **    | 0.49 (0.11) | ***  | -0.08 (0.07) |     |
|                                       | mummy  | 2.26 (0.42) | ***   | 1.03 (0.16) | ***  | 0.55 (0.21)  | *** |
|                                       | banana | 3.28 (0.98) | ***   | 1.78 (0.26) | ***  | 1.46 (0.28)  | *** |
| 6. Multiple                           |        |             |       |             |      |              |     |
| Voices                                | cat    | 2.35 (0.43) | ***   | 0.55 (0.14) | ***  | -0.01 (0.12) |     |
|                                       | mummy  | 1.06 (0.60) | ***   | 0.93 (0.19) | ***  | 0.67 (0.16)  | *** |
|                                       | banana | 3.62 (0.74) | ***   | 1.14 (0.23) | ***  | 0.61 (0.28)  | *** |

Simulated listening preferences based on *recognition* (mean and standard deviation) for all conditions. Listening preferences that are significantly above 0 are indicated (based on an uncorrected one-sided *t*-Test): \*  $p < .05$ , \*\*  $p < .01$ , \*\*\*  $p < .001$
